# Supplementary material for: Synthesis of cyclic α-pinane carbonate – a potential monomer for bio-based polymers
Source: Royal Society of Chemistry journal article supplement (doi:10.1039/d1ra07943c), 2022-01-01
Supplement: d1ra07943c1.pdf [file d1ra07943c1.pdf]

### Electronic Supplementary Information

The DSC thermal analysis in **ESI Fig. 1** shows some evidence of gradual loss in heat flow after the melting point, as the nitrogen purge gas removes developing sample vapours. Therefore, this method could not be used to measure the normal boiling points of the samples, which requires an equilibrium vapour formation at an atmospheric pressure.

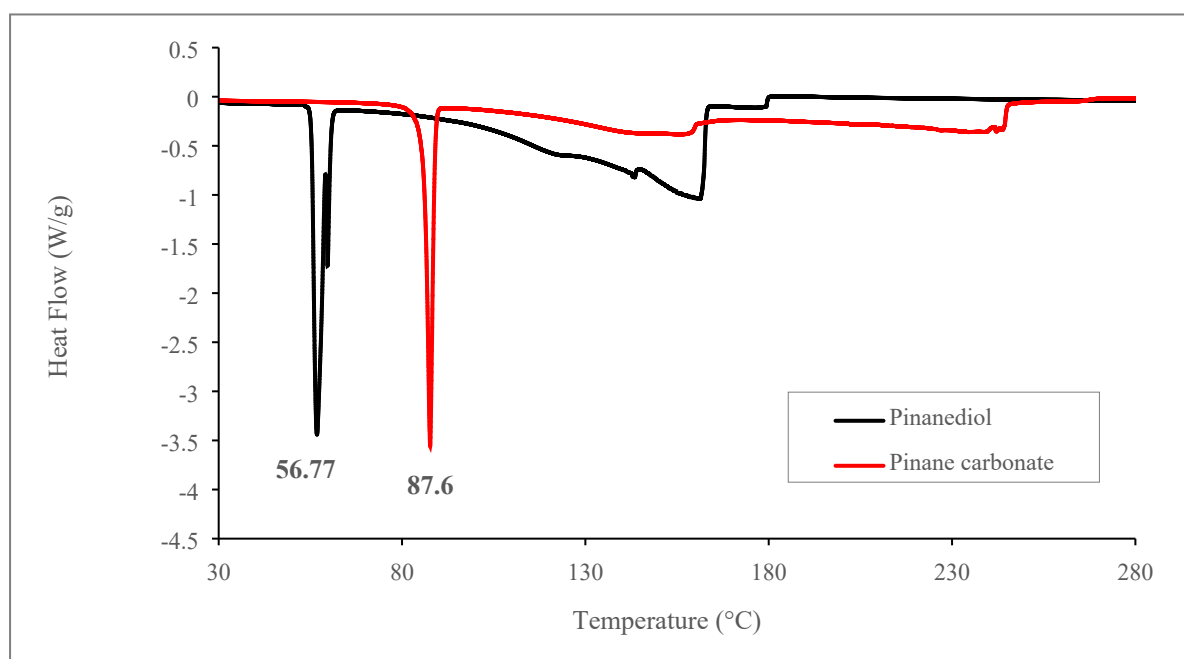

**ESI Figure 1:** DSC data for determinations of the melting points of the pinanediol and the pinane carbonate.

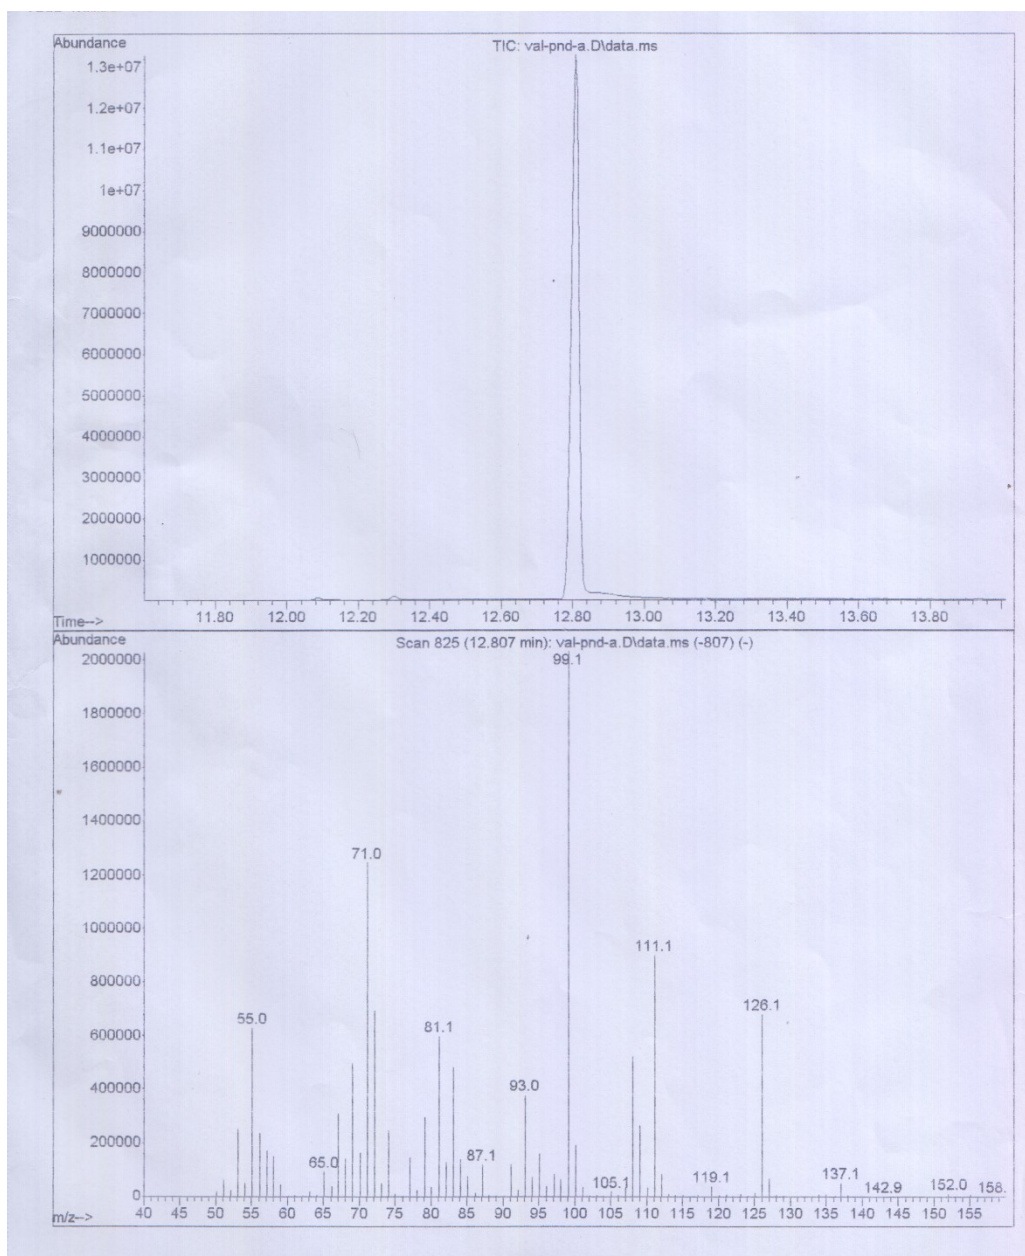

**ESI Figure 2:** GCMS data for the  $\alpha$ -pinenediol acquired using a 7890B Agilent GC coupled to a 5977B mass selective detector (MSD) in full scan mode from 50-520amu and 70 eV.

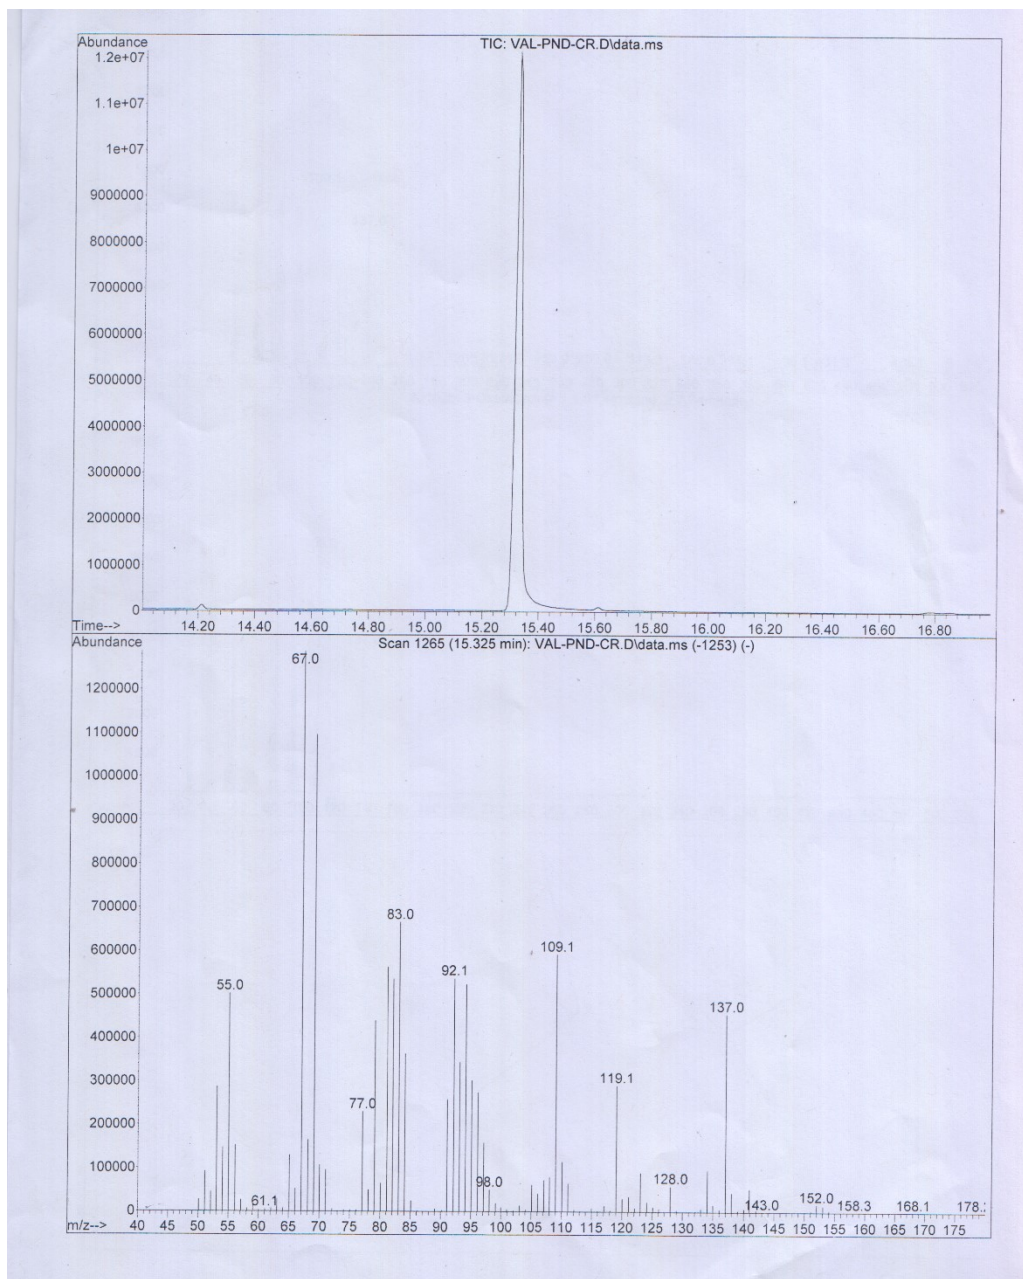

**ESI Figure 3:** GCMS data for the  $\alpha$ -pinane carbonate acquired using 7890B Agilent GC coupled to a 5977B mass selective detector (MSD) in full scan mode from 50-520amu and 70 eV.

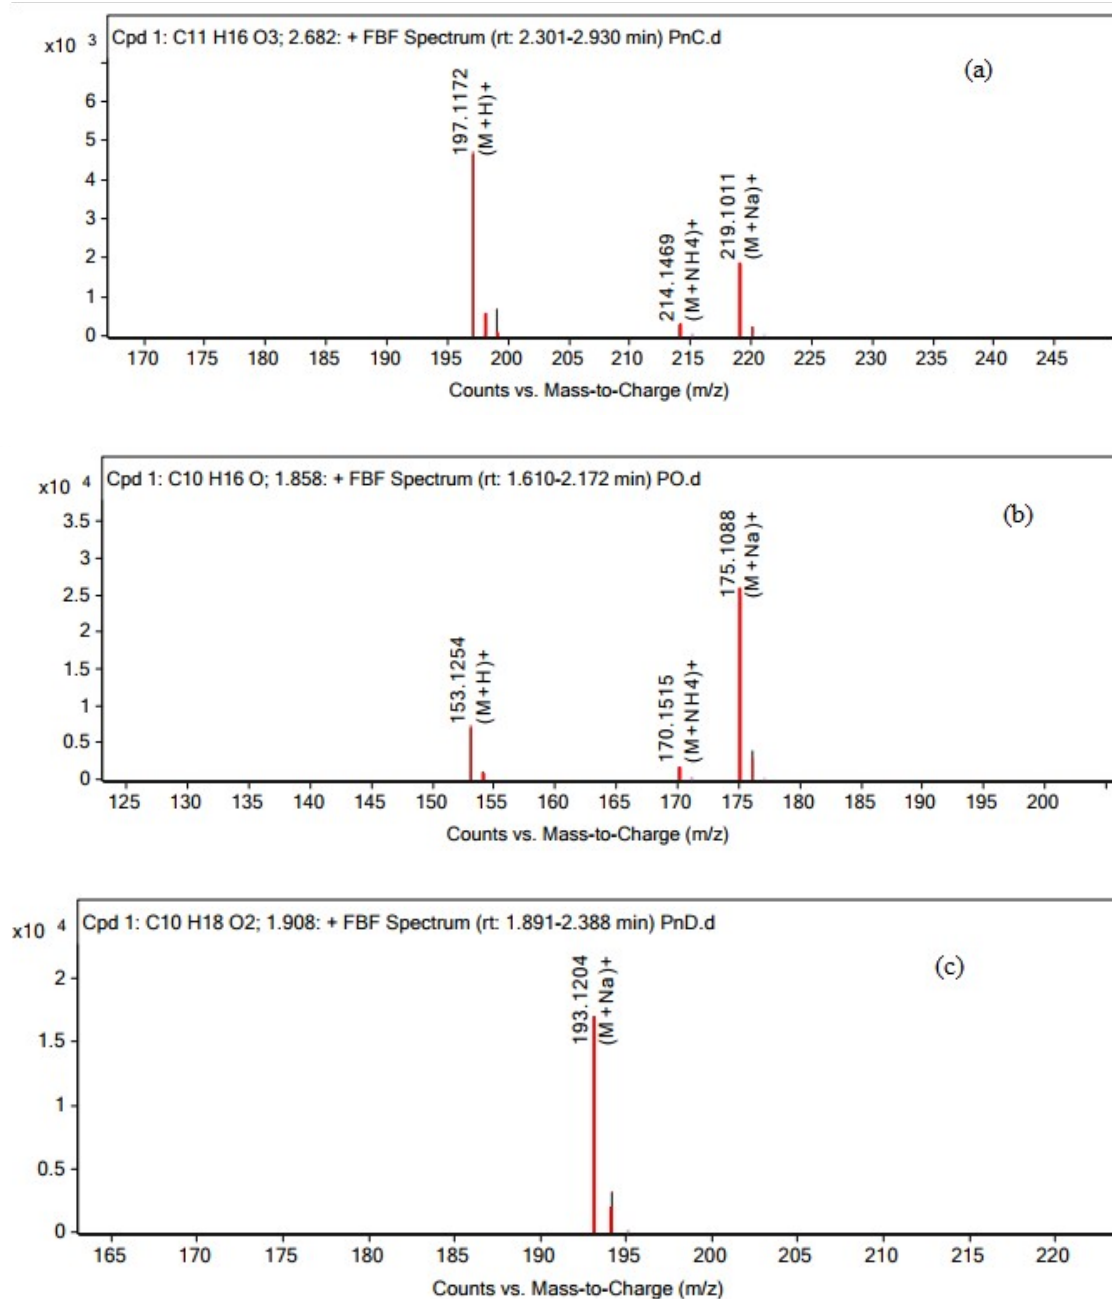

**ESI** Figure 4: QTOF MS data for the (a)  $\alpha$ -pinane carbonate, (b)  $\alpha$ -pinene epoxide and (c)  $\alpha$ -pinanediol.

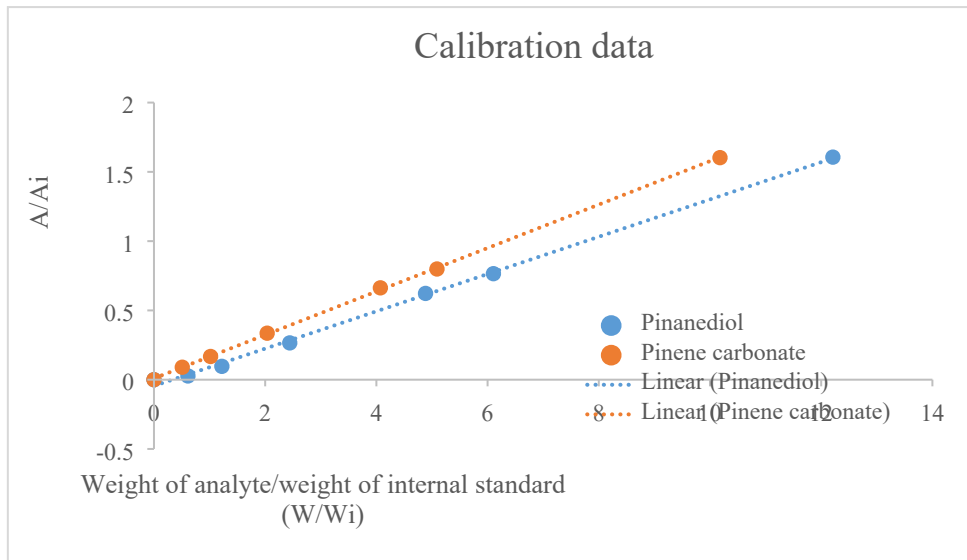

**ESI Figure 5:** Calibration data for the  $\alpha$ -pinene carbonate and  $\alpha$ -pinanediol.
